# Supplementary material for: The N-terminal soluble domains of Bacillus subtilis CopA exhibit a high affinity and capacity for Cu(i) ions
Source: Royal Society of Chemistry journal article supplement (doi:10.1039/b810412c), 2008-11-21
Supplement: b810412c.pdf [file b810412c.pdf]

## Supplementary data

### The N-terminal soluble domains of *Bacillus subtilis* CopA exhibit a high affinity and capacity for Cu(I) ions

Chloe Singleton and Nick E. Le Brun

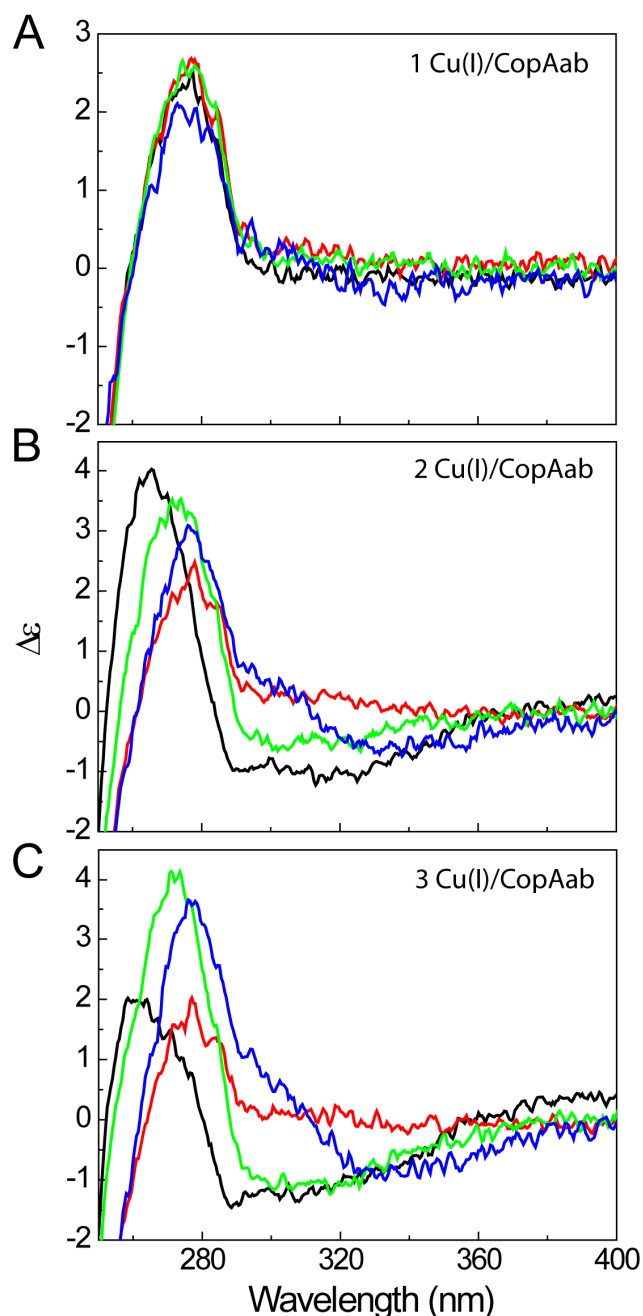

**Figure S1.** The effect of DTT, glutathione and cysteine on Cu(I)-binding to CopAab monitored by CD spectroscopy.

CD spectra of CopAab with (a) 1 Cu(I) (b) 2 Cu(I) and (c) 3 Cu(I) ions per protein molecule in the presence of no exogenous thiols (black) or a 20-fold excess of DTT (red), glutathione (green) or cysteine (blue). CopAab concentrations were 40  $\mu$ M for the no added exogenous thiol control and DTT experiments and 30  $\mu$ M for the glutathione and cysteine experiments. All samples were in 100 mM Mops, 100 mM NaCl, pH 7.5.
